# Supplementary material for: Prediction of PKCθ Inhibitory Activity Using the Random Forest Algorithm
Source: MDPI journal article supplement (doi:10.3390/ijms11093413), 2010-09-20
Supplement: s2 [file s2]

*Correction*

## **Prediction of PKC $\theta$ Inhibitory Activity Using the Random Forest Algorithm**

*Published: 20 October 2010*

---

A new version of the paper [1] was uploaded today. We found that the pagination of reference 60 was not correct. We would like to apologize for any inconvenience caused to our readers.

*Int. J. Mol. Sci.* Editorial Office

### **References**

1. Hao, M.; Li, Y.; Wang, Y.; Zhang, S. Prediction of PKC $\theta$  Inhibitory Activity Using the Random Forest Algorithm. *Int. J. Mol. Sci.* **2010**, *11*, 3413–3433.
